# Supplementary material for: Quality of Life and Post-Surgical Complications in Patients on Chronic Antiplatelet Therapy with Proximal Femur Fracture: 12-Month Follow-Up after Implementing a Strategy to Shorten the Time to Surgery
Source: MDPI journal article supplement (doi:10.3390/jcm12031130), 2023-01-31
Supplement: s1 [file s1]

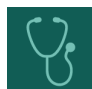

**Table S1.** EQ-5D-5L index score and EQ-5D VAS assessment at different follow-up times.

| Surgery        | Pre-fracture    |                   |                  | Preoperative    |                   |                  | Ward            |                   |                  | 30 days         |                   |                  | 6 months        |                   |                  | 12 months       |                   |                 | p      |
|----------------|-----------------|-------------------|------------------|-----------------|-------------------|------------------|-----------------|-------------------|------------------|-----------------|-------------------|------------------|-----------------|-------------------|------------------|-----------------|-------------------|-----------------|--------|
|                | Early n =<br>71 | Delayed<br>n = 57 | Total n =<br>128 | Early n<br>= 71 | Delayed<br>n = 57 | Total n =<br>128 | Early n<br>= 71 | Delayed<br>n = 57 | Total n<br>= 128 | Early n =<br>55 | Delayed n<br>= 69 | Total n<br>= 124 | Early n =<br>45 | Delayed n<br>= 60 | Total n<br>= 105 | Early n =<br>42 | Delayed n<br>= 56 | Total n<br>= 98 |        |
| EQ-5D VAS      |                 |                   |                  |                 |                   |                  |                 |                   |                  |                 |                   |                  |                 |                   |                  |                 |                   |                 |        |
| Mean           | 60.6            | 66.1              | 63.4             | 37.1            | 40.9              | 39.0             | 46.2            | 47.6              | 46.9             | 54.8            | 50.9              | 52.9             | 56.9            | 55.6              | 56.3             | 50.5            | 50.9              | 50.7            | <0.001 |
| (SD)           | (2.7)           | (2.4)             | (1.8)            | (2.4)           | (2.1)             | (1.6)            | (2.5)           | (2.2)             | (1.7)            | (2.6)           | (2.2)             | (1.7)            | (3.0)           | (2.6)             | (1.9)            | (3.8)           | (3.3)             | (2.5)           |        |
| EQ-5D-5L index |                 |                   |                  |                 |                   |                  |                 |                   |                  |                 |                   |                  |                 |                   |                  |                 |                   |                 |        |
| Mean           | 0.547           | 0.563             | 0.555            | -0.378          | -0.319            | -0.349           | 0.057           | 0.174             | 0.115            | 0.355           | 0.333             | 0.344            | 0.418           | 0.396             | 0.407            | 0.325           | 0.356             | 0.340           | <0.001 |
| (SD)           | (0.044)         | (0.038)           | (0.029)          | (0.033)         | (0.028)           | (0.022)          | (0.054)         | (0.046)           | (0.035)          | (0.048)         | (0.041)           | (0.032)          | (0.396)         | (0.048)           | (0.036)          | (0.060)         | (0.052)           | (0.040)         |        |
